# Supplementary material for: High Levels of Expression of Cartilage Oligomeric Matrix Protein in Lymph Node Metastases in Breast Cancer Are Associated with Reduced Survival
Source: MDPI journal article supplement (doi:10.3390/cancers13235876), 2021-11-23
Supplement: s1 [file s1]

# Supplementary materials: High Levels of Expression of Cartilage Oligomeric Matrix Protein in Lymph Node Metastases in Breast Cancer Are Associated with Reduced Survival

Konstantinos S. Papadakos, Catharina Hagerling, Lisa Rydén, Anna-Maria Larsson and Anna M. Blom

**Table S1.** COMP expression in distant metastases in relation to clinicopathological variables in patients with metastatic breast cancer.

| Variables         | COMP DM Cancer Cells |    |   |    | <i>P</i> | COMP DM Stroma |    |    |    | <i>P</i> |
|-------------------|----------------------|----|---|----|----------|----------------|----|----|----|----------|
|                   | 0                    | 1  | 2 | 3  |          | 0              | 1  | 2  | 3  |          |
| Age <65           | 11                   | 7  | 2 | 6  | 0.33     | 2              | 9  | 7  | 8  | 0.76     |
| >65               | 6                    | 8  | 7 | 5  |          | 2              | 8  | 11 | 5  |          |
| MFI 0y            | 1                    | 4  | 2 | 3  | 0.17     | 0              | 4  | 3  | 3  | 0.45     |
| 0-3 y             | 3                    | 0  | 1 | 2  |          | 1              | 1  | 1  | 3  |          |
| >3y               | 13                   | 11 | 6 | 6  |          | 3              | 12 | 14 | 7  |          |
| Subtype ductal    | 9                    | 10 | 8 | 5  | 0.88     | 2              | 11 | 13 | 6  | 0.54     |
| Lobular           | 7                    | 4  | 1 | 6  |          | 2              | 5  | 4  | 7  |          |
| PT T1             | 6                    | 6  | 5 | 3  | 0.99     | 2              | 4  | 10 | 4  | 0.89     |
| T2                | 6                    | 5  | 1 | 6  |          | 0              | 9  | 3  | 6  |          |
| T3                | 4                    | 1  | 0 | 1  |          | 2              | 1  | 2  | 1  |          |
| T4                | 1                    | 1  | 2 | 1  |          | 0              | 1  | 3  | 1  |          |
| Node pos          | 13                   | 10 | 3 | 9  | 0.74     | 3              | 12 | 12 | 8  | 0.75     |
| Node neg          | 3                    | 3  | 3 | 2  |          | 1              | 3  | 4  | 3  |          |
| NHG I             | 1                    | 3  | 0 | 1  | 0.65     | 0              | 2  | 2  | 1  | 0.90     |
| II                | 13                   | 3  | 4 | 6  |          | 4              | 8  | 7  | 7  |          |
| III               | 2                    | 4  | 2 | 2  |          | 0              | 4  | 4  | 2  |          |
| PT ER-            | 2                    | 0  | 2 | 2  | 0.36     | 0              | 1  | 3  | 2  | 0.26     |
| ER+               | 15                   | 11 | 7 | 8  |          | 4              | 14 | 13 | 10 |          |
| PT HER2-<br>HER2+ |                      |    |   |    |          |                |    |    |    |          |
| Mets <3           | 12                   | 10 | 7 | 11 | 0.07     | 3              | 11 | 14 | 12 | 0.13     |
| >=3               | 5                    | 5  | 2 | 0  |          | 1              | 6  | 4  | 1  |          |
| CTC <5            | 4                    | 9  | 4 | 4  | 0.51     | 1              | 9  | 6  | 5  | 0.84     |
| >=5               | 13                   | 6  | 4 | 7  |          | 3              | 8  | 12 | 7  |          |
| Cluster neg       | 9                    | 13 | 6 | 9  | 0.13     | 2              | 13 | 13 | 9  | 0.62     |
| pos               | 8                    | 2  | 2 | 2  |          | 2              | 4  | 5  | 3  |          |
| Visc no           | 10                   | 7  | 4 | 8  | 0.59     | 3              | 7  | 11 | 8  | 0.61     |
| yes               | 7                    | 8  | 5 | 3  |          | 1              | 10 | 7  | 5  |          |
| Bone-only no      | 10                   | 11 | 6 | 5  | 0.51     | 3              | 12 | 10 | 7  | 0.26     |
| yes               | 7                    | 4  | 3 | 6  |          | 1              | 5  | 8  | 6  |          |
| Lung met no       | 12                   | 14 | 8 | 10 | 0.16     | 3              | 14 | 15 | 12 | 0.37     |
| yes               | 5                    | 1  | 1 | 1  |          | 1              | 3  | 3  | 1  |          |
| Liver mets no     | 13                   | 10 | 7 | 9  | 0.67     | 4              | 11 | 14 | 10 | 1.0      |
| yes               | 4                    | 5  | 2 | 2  |          | 0              | 6  | 4  | 3  |          |
| Bone mets no      | 3                    | 2  | 1 | 2  | 0.96     | 1              | 3  | 2  | 2  | 0.63     |
| yes               | 14                   | 13 | 8 | 9  |          | 3              | 14 | 16 | 11 |          |
